# Supplementary material for: Management of Cancer-Associated Venous Thrombosis: A Nationwide Survey among Danish Oncologists
Source: PubMed Central journal article supplement (PMC8208837; doi:10.1055/s-0041-1729754), 2021-06-16
Supplement: 10-1055-s-0041-1729754-s200103.pdf [file 10-1055-s-0041-1729754-s200103.pdf]

**Supplementary Table 1**

## Demographics

|                                                                                                                                                  |                |
|--------------------------------------------------------------------------------------------------------------------------------------------------|----------------|
| Geographical region of employment ( <i>n</i> = 142)                                                                                              | % ( <i>n</i> ) |
| Capital region of Denmark                                                                                                                        | 28.9 (41)      |
| Central Denmark region                                                                                                                           | 21.8 (31)      |
| North Denmark region                                                                                                                             | 9.9 (14)       |
| Region of Southern Denmark                                                                                                                       | 32.4 (46)      |
| Region Zealand                                                                                                                                   | 7.0 (10)       |
| Position ( <i>n</i> = 142)                                                                                                                       | % ( <i>n</i> ) |
| Chief physician                                                                                                                                  | 36.6 (52)      |
| Senior registrar                                                                                                                                 | 23.9 (34)      |
| Registrar                                                                                                                                        | 25.4 (36)      |
| Intern/resident                                                                                                                                  | 14.1 (20)      |
| Oncology subspecialty <sup>a</sup> ( <i>n</i> = 142)                                                                                             | % ( <i>n</i> ) |
| Breast cancer                                                                                                                                    | 18.3 (26)      |
| Lung cancer                                                                                                                                      | 19.0 (27)      |
| Gastrointestinal cancer                                                                                                                          | 19.0 (27)      |
| Head-neck cancer                                                                                                                                 | 8.5 (12)       |
| Urological                                                                                                                                       | 9.2 (13)       |
| Unspecified, shifting between subspecialties                                                                                                     | 19.7 (28)      |
| Cancer of unknown primary, palliation, sarcoma, gynecological cancer, neuroendocrine tumor, central nervous system tumor, and malignant melanoma | <4             |

<sup>a</sup>The response format was a free-text box, allowing participants to give an open answer.

## Treatment of venous thromboembolism in the oncology department

|                                                                                                          |                |
|----------------------------------------------------------------------------------------------------------|----------------|
| Are patients with DVT treated in the department? ( <i>n</i> = 142)                                       | % ( <i>n</i> ) |
| Yes                                                                                                      | 98.6 (140)     |
| No                                                                                                       | 1.4 (2)        |
| Are patients with pulmonary embolism treated in the department? ( <i>n</i> = 142)                        | % ( <i>n</i> ) |
| Yes                                                                                                      | 62.7 (89)      |
| Yes, but only if the patient is hemodynamically stable                                                   | 35.9 (51)      |
| No                                                                                                       | 1.4 (2)        |
| Patients with pulmonary embolism who are not hemodynamically stable are treated in the: ( <i>n</i> = 51) | % ( <i>n</i> ) |
| Medical department                                                                                       | 0              |
| Acute medical unit                                                                                       | 9.8 (5)        |
| Cardiology department                                                                                    | 86.3(44)       |
| Other (specify)                                                                                          | 3.9 (2)        |

## Diagnosis

|                                                                                                                                                                                           |                |
|-------------------------------------------------------------------------------------------------------------------------------------------------------------------------------------------|----------------|
| What is the most commonly used strategy to assess the clinical probability of DVT? ( <i>n</i> = 140)<br>(Danish guidelines do not provide suggestions on diagnostic tools)                | % ( <i>n</i> ) |
| Wells' score                                                                                                                                                                              | 15.0 (21)      |
| Other scoring system                                                                                                                                                                      | 0              |
| Clinical assessment (no scoring system)                                                                                                                                                   | 80.7 (113)     |
| Don't know                                                                                                                                                                                | 4.3 (6)        |
| What is the most commonly used strategy to assess the clinical probability of pulmonary embolism? ( <i>n</i> = 140)<br>(Danish guidelines do not provide suggestions on diagnostic tools) | % ( <i>n</i> ) |
| Wells' score                                                                                                                                                                              | 5.0 (7)        |
| Geneva score                                                                                                                                                                              | 0              |
| Other scoring system                                                                                                                                                                      | 0              |
| Clinical assessment (no scoring system)                                                                                                                                                   | 94.3 (132)     |
| Don't know                                                                                                                                                                                | 0.7 (1)        |

## Anticoagulant treatment

|                                                                                                                                                                               |                |
|-------------------------------------------------------------------------------------------------------------------------------------------------------------------------------|----------------|
| First-line treatment in the department of patients with active cancer and cancer associated venous thrombosis: ( <i>n</i> = 140)<br>(Guidelines recommend weight-based LMWH)  | % ( <i>n</i> ) |
| Vitamin K antagonist (warfarin)                                                                                                                                               | 0              |
| Low-molecular-weight heparin (weight-based)                                                                                                                                   | 98.6 (138)     |
| NOAC (Xarelto, Lixiana, Pradaxa, Eliquis)                                                                                                                                     | 0.7 (1)        |
| Don't know                                                                                                                                                                    | 0.7 (1)        |
| Second-line treatment in the department of patients with active cancer and cancer-associated venous thrombosis: ( <i>n</i> = 140)<br>(Guidelines recommended VKA at the time) | % ( <i>n</i> ) |
| Vitamin K-antagonist (warfarin)                                                                                                                                               | 12.1 (17)      |
| Low-molecular-weight heparin (weight-based)                                                                                                                                   | 6.4 (9)        |
| NOAC (Xarelto, Lixiana, Pradaxa, Eliquis)                                                                                                                                     | 36.4 (51)      |
| Don't know                                                                                                                                                                    | 45.0 (63)      |
| Specification of NOAC (second-line treatment): ( <i>n</i> = 36)                                                                                                               | % ( <i>n</i> ) |
| Xarelto                                                                                                                                                                       | 72.2 (26)      |
| Lixiana                                                                                                                                                                       | 2.8 (1)        |
| Pradaxa                                                                                                                                                                       | 11.1 (4)       |
| Eliquis                                                                                                                                                                       | 13.9 (5)       |

Abbreviations: DVT, venous thromboembolism; LMWH, low-molecular-weight heparin; NOAC, novel oral anticoagulants; VKA, vitamin K antagonists.

## Treatment duration

| Patients with active cancer and new-onset DVT are by default treated: (chose answer based on the common practice in the department; $n = 139$ )<br>(Guidelines recommend continued treatment in patients with active cancer. Treatment recommendations are irrespective of type of VTE (DVT/PE)) | % (n)      |
|--------------------------------------------------------------------------------------------------------------------------------------------------------------------------------------------------------------------------------------------------------------------------------------------------|------------|
| 3 months                                                                                                                                                                                                                                                                                         | 3.6 (5)    |
| 6 months                                                                                                                                                                                                                                                                                         | 36.0 (50)  |
| 12 months                                                                                                                                                                                                                                                                                        | 2.2 (3)    |
| As long as the patient have active cancer                                                                                                                                                                                                                                                        | 58.3 (81)  |
| Other, specify:                                                                                                                                                                                                                                                                                  | 0          |
| Patients with active cancer and new-onset pulmonary embolism are by default treated: (chose answer based on the common practice in the department) ( $n = 139$ )<br>(Guidelines recommend continued treatment in patients with active cancer)                                                    | % (n)      |
| 3 months                                                                                                                                                                                                                                                                                         | 0          |
| 6 months                                                                                                                                                                                                                                                                                         | 20.1 (28)  |
| 12 months                                                                                                                                                                                                                                                                                        | 2.2 (3)    |
| As long as the patient have active cancer                                                                                                                                                                                                                                                        | 77.7 (108) |
| Other, specify:                                                                                                                                                                                                                                                                                  | 0          |

Abbreviations: DVT, venous thromboembolism; PE, pulmonary embolism; VTE, venous thromboembolism.

## Increased bleeding risk

| Our treatment choice in the department for patients with increased bleeding risk is: ( $n = 139$ )<br>(Guidelines recommend individual assessment) | % (n)     |
|----------------------------------------------------------------------------------------------------------------------------------------------------|-----------|
| Vitamin K-antagonist (warfarin)                                                                                                                    | 0         |
| Low-molecular-weight heparin (weight-based)                                                                                                        | 40.3 (56) |
| NOAC (Xarelto, Lixiana, Pradaxa, Eliquis)                                                                                                          | 0         |
| Individual assessment in terms of type and intensity of anticoagulant treatment                                                                    | 49.6 (69) |
| Don't know                                                                                                                                         | 10.1 (14) |

Abbreviation: NOAC, novel oral anticoagulant.

## Recurrence while in anticoagulant treatment

| Our treatment choice in the department if patients have a recurrent VTE while treated with LMWH: ( $n = 138$ )<br>[Guidelines recommend dose escalation of LMWH]                                                                                                                                                                                                                                                                                                                                                                                                                                                                                                                                                                                                                                                                                                                                                                                                                                                                            | % (n)     |
|---------------------------------------------------------------------------------------------------------------------------------------------------------------------------------------------------------------------------------------------------------------------------------------------------------------------------------------------------------------------------------------------------------------------------------------------------------------------------------------------------------------------------------------------------------------------------------------------------------------------------------------------------------------------------------------------------------------------------------------------------------------------------------------------------------------------------------------------------------------------------------------------------------------------------------------------------------------------------------------------------------------------------------------------|-----------|
| Increases dosage of LMWH                                                                                                                                                                                                                                                                                                                                                                                                                                                                                                                                                                                                                                                                                                                                                                                                                                                                                                                                                                                                                    | 70.3 (97) |
| Switches to Vitamin K antagonist (warfarin)                                                                                                                                                                                                                                                                                                                                                                                                                                                                                                                                                                                                                                                                                                                                                                                                                                                                                                                                                                                                 | 0.7 (1)   |
| Switches to NOAC (Xarelto, Lixiana, Pradaxa, Eliquis)                                                                                                                                                                                                                                                                                                                                                                                                                                                                                                                                                                                                                                                                                                                                                                                                                                                                                                                                                                                       | 2.2 (3)   |
| Other, specify:<br><ul style="list-style-type: none"> <li>• Confers with center for thrombosis and hemostasis</li> <li>• Always confers with the thrombosis clinic/cardiologist</li> <li>• Asks the cardiologists/thrombosis center, who have specialized knowledge.</li> <li>• The hemostasis specialist on guard is contacted for advice.</li> <li>• Confer with center of thrombosis and hemostasis</li> <li>• Fortsæt med gængse dosering LMH efter vægt i terapeutisk dosering (continue LMWH without dose-adjustment)</li> <li>• Increase dosage to 125%</li> <li>• Increase dosage</li> <li>• Referral to the specialized department to determine cause. Additionally, switches to NOAC</li> <li>• Dividing current dose into two</li> <li>• Continuing current treatment</li> <li>• Treatment twice daily with LMWH</li> <li>• Seeks specialist advice</li> <li>• Dividing LMWH in two daily dosage, increase dosage of LMWH, and contacting the center of thrombosis and hemostasis</li> <li>• Dose is divided into two</li> </ul> | 10.9 (15) |
| Don't know                                                                                                                                                                                                                                                                                                                                                                                                                                                                                                                                                                                                                                                                                                                                                                                                                                                                                                                                                                                                                                  | 15.9 (22) |

Abbreviations: DVT, venous thromboembolism; LMWH, low-molecular-weight heparin; NOAC, novel oral anticoagulants; VTE, venous thromboembolism.

## Follow-Up

| Follow-up after cancer associated thrombosis ( $n = 137$ )<br>(Not specified in the Danish guidelines) | % (n)     |
|--------------------------------------------------------------------------------------------------------|-----------|
| The patients are seen in the outpatient clinic at the oncology department for follow-up/control        | 44.5 (61) |
| The patient is referred to follow-up/control in a specialized thrombosis clinic/unit                   | 34.3 (47) |
| Follow-up/control is handled by the general practitioner                                               | 13.9 (19) |
| Don't know                                                                                             | 7.3 (10)  |

## Thromboprophylaxis

| The question regards all patients in the department (including non-CT patients)<br>All patients with active cancer, who are hospitalized and immobilized receives by default thromboprophylaxis (unless it is contraindicated)? ( <i>n</i> = 139)<br>(Guidelines recommend prophylaxis unless contraindicated) | % ( <i>n</i> ) |
|----------------------------------------------------------------------------------------------------------------------------------------------------------------------------------------------------------------------------------------------------------------------------------------------------------------|----------------|
| Yes                                                                                                                                                                                                                                                                                                            | 27.3 (38)      |
| Yes, if the patient has evident risk factors for VTE (e.g., prior DVT or PE)                                                                                                                                                                                                                                   | 28.1 (39)      |
| Only exceptionally                                                                                                                                                                                                                                                                                             | 44.6 (62)      |

Abbreviations: CT, cancer-associated venous thrombosis; DVT, venous thromboembolism; PE, pulmonary embolism; VTE, venous thromboembolism.

## Cancer-associated venous thrombosis guideline

| Does the department have a clinical practice guideline for cancer-associated venous thrombosis? ( <i>n</i> = 142) | % ( <i>n</i> ) |
|-------------------------------------------------------------------------------------------------------------------|----------------|
| Yes                                                                                                               | 52.1 (74)      |
| No                                                                                                                | 11.3 (16)      |
| Don't know                                                                                                        | 36.6 (52)      |
